1 **PtRNAdb: A web resource of Plant tRNA genes from a wide range of plant**  
2 **species**

3

4 Durdam Das, Shafaque Zahra, Ajeet Singh and Shailesh Kumar\*

5

6 \*Corresponding Author

7 Mailing address: Bioinformatics Lab, National Institute of Plant Genome Research (NIPGR),

8 Aruna Asaf Ali Marg, New Delhi 110067, India. Phone: +91-11-26735217, Fax: +91-11-

9 26741658, Email: [shailesh@nipgr.ac.in](mailto:shailesh@nipgr.ac.in)

10

11 **Abstract**

12 tRNA, as well as their derived products such as short interspersed nuclear elements (SINEs),  
13 pseudogenes and transfer-RNA, derived fragments (tRFs) has now been shown to be vital for  
14 cellular life, functioning and adaptation during different stress conditions in all diverse life  
15 forms. In this study, we have developed PtRNAdb ([www.nipgr.ac.in/PtRNAdb](http://www.nipgr.ac.in/PtRNAdb)), a plant  
16 exclusive tRNA database containing 113849 tRNA gene sequences from phylogenetically  
17 diverse plant species. We have analysed a total of 106 nuclear, 89 plastidial and 38  
18 mitochondrial genomes of plants by tRNAscan-SE software package, and after careful  
19 curation of the output data, we developed this database and integrated the data. The  
20 information about the tRNA gene sequences obtained, were further enriched with consensus  
21 sequence based study of tRNA genes based on their isoacceptors and isodecoders. We have  
22 also built covariance models based on the isoacceptors and isodecoders of all the tRNA  
23 sequences using infernal tool. The user can also perform BLAST not only against PtRNAdb  
24 entries but also against all the tRNA sequences stored in PlantRNA databases; and annotated  
25 tRNA genes across the plant kingdom available at NCBI. For the users' ease, we have also  
26 incorporated the tRNAscan-SE tool for tRNA gene prediction, and ViennaRNA package for  
27 structural analysis on the home page of PtRNAdb. This resource is believed to be of high  
28 utility for plant researchers as well as molecular biologists to carry out further exploration of  
29 plant tRNAome on a wider spectrum, as well as for performing comparative and evolutionary  
30 studies related to tRNAs and their derivatives across all domains of life.

31 **Keywords:** tRNA, noncoding RNAs, PtRNAdb, Database, Data curation,  
32 Genomics

33 **Database URL:** <http://www.nipgr.ac.in/PtRNAdb/>

34

35

## 36 **Introduction**

37 The classical transfer RNA molecules or tRNAs are the most abundant and highly conserved  
38 class of non-coding RNAs existing in all life forms. tRNAs with their length ranging from  
39 approximately 70-100 nucleotides (nt) can be represented as a cloverleaf with four stems, and  
40 the three-dimensional structure as an “L” shape. These distinctly structured molecules act as a  
41 connecting bridge between the genetic code and the corresponding translation product  
42 (protein) and can be said to be genetic decoders of the code<sup>1</sup>. Apart from their conventional  
43 role as adapters in protein translation, tRNAs play a diverse role in cellular functioning<sup>2</sup>. In  
44 recent years, burgeons of studies related to extra-translational roles of tRNAs have been  
45 performed, revealing new dimensions and perspective to the tRNA biology. tRNA can now  
46 be regarded as a multi-functional molecular entity governing different aspects of cellular  
47 physiology and metabolism in both prokaryotes and eukaryotes alike<sup>3</sup>. Few identified extra  
48 translational functions of both charged as well as uncharged tRNAs in association with cell  
49 signalling, stress regulation, and ribosomal stability have been established<sup>4,5</sup>. These are also  
50 involved in the apoptotic regulation process in the mammalian system<sup>6</sup>. tRNAs upon  
51 endonucleolytic cleavage give rise to tRNA halves as well as transfer RNA derived fragments  
52 (e.g. tRFs) which are associated with pathogenesis and stress signalling along with other  
53 functions in a wide range of organism including plants<sup>7–13</sup>. tRNA related short interspersed  
54 elements (SINES) with unknown functions are also detected in various organisms<sup>14–16</sup>. The  
55 existence of isoacceptors and isodecoders add another layer of intricacy in the tRNA  
56 world<sup>17,18</sup>. Although their most studied roles revolve around protein translation,  
57 innumerable complexities pertaining to tRNA biogenesis, processing, intron sequences,  
58 pseudogenes, suppressor tRNAs, modifications, interactions with different proteins, diversity  
59 and the differential expression of different isoacceptors and isodecoders highlight another  
60 level of complexity in the tRNA world<sup>19–24</sup>. In plants, translation occurs in the cytosol but  
61 also in mitochondria and chloroplast<sup>25</sup>. Thus, there is a higher level of complexity associated  
62 with tRNA synthesis, enzymatic machinery involved, localization, and their intricate  
63 interactions and functioning within the different compartments of the plant cell<sup>26</sup>. The gain  
64 and loss of introns amongst diverse plant species reveal their significance in the during  
65 various stages of evolution <sup>21,27</sup> and aid in studying the comparative genomics across the  
66 plant kingdom. The current era with robust Next Generation Sequencing (NGS) technology  
67 provides massive opportunity to invade and explore the genomics and extensive  
68 transcriptomic repertoire. The sphere of tRNA biology with respect to their structural and

69 functional complications of tRNAs has captivated the attention of scientists from a long time  
70 and is continuously flourishing. In order to explore the tRNAomic world in a systematic and  
71 specific way from genetics and functional genomics perspective, a number of web  
72 repositories have been developed from time to time. Some of the famous and currently  
73 available web portals for tRNA related information includes Rfam28, tRNAdb29,  
74 GtRNAdb30, tRNADB-CE29 and plantRNA31. The first plant-exclusive web repository,  
75 plantRNA was developed in 2013. This knowledgebase harbours annotated tRNA gene  
76 sequences and their functions from complete nuclear and organellar genomes from only  
77 eleven evolutionarily diverse plants. Due to the availability of a large number of sequenced  
78 genomes, there is still a lacuna which requires to be filled for the exploration of vast plant  
79 tRNAome in a wider spectrum. Here, we have introduced PtRNAdb  
80 ([www.nipgr.ac.in/PtRNAdb](http://www.nipgr.ac.in/PtRNAdb)), the plant exclusive web repository that stores tRNA gene  
81 sequences and other related information from 3577 different nuclear as well as mitochondrial,  
82 chloroplastic, and plastidial genomes currently available at National Center for  
83 Biotechnology Information (NCBI). In addition to the information generated by tRNAscan-  
84 SE software package, the intron sequences with their position, length, and GC% have also  
85 been incorporated within this database. Additionally, secondary structures of both precursor  
86 and mature tRNAs can be also visualized at the search result page. As the consensus  
87 transcriptional internal control regions termed as A and B box sequence elements are highly  
88 conserved among plants 32,33, are AT-rich34 and, their position in tRNA, as well as CAA  
89 motifs, have also been highlighted. CAA motifs are commonly present in the upstream of  
90 tRNA genes35 and can act as transcription initiation site. To the best of our knowledge,  
91 PtRNAdb is the best platform for plant tRNA genes. The overall representation and major  
92 sections of PtRNAdb are shown in Figure 1.

93

## 94 **Methodology**

### 95 **Data retrieval**

96 The data was retrieved from National Center for Biotechnology Information (NCBI) database  
97 genome browser. The genomes having chromosomal level information were only  
98 downloaded and the plant genomes which had scaffold or contigs level of information were  
99 excluded to avoid unambiguity in the study. The organellar genomes of only those plants  
100 were retrieved for which nuclear data at chromosomal level was also available. The nuclear  
101 genome sequence files were downloaded by using File Transfer Protocol (FTP). Further, any

102 extra sequences present in nuclear genomes were manually removed. To download the  
103 organellar genomes i.e. mitochondrial and plastidial, the ‘esearch’ and ‘efetch’ utility of  
104 NCBI was employed. The ‘E-utilities’ use a fixed URL syntax that translates a standard set of  
105 input parameters into the values necessary for various NCBI software components to search  
106 and retrieve the requested data.

#### 107 **tRNA gene prediction**

108 tRNAscan-SE tool developed by Low and Eddy, 1997 (1) was used to predict the tRNA  
109 sequences from the genome files. It offers high accuracy and reliable predictions and has  
110 been utilized for tRNA gene prediction in tRNA research (2). In this study, tRNAscan-SE  
111 (Version 2.0.3) was used with eukaryotic (-E) and organellar (-O) modes for nuclear and  
112 organellar genomes respectively. The complete command line options that were used are  
113 discussed in the method section of PtRNAdb database  
114 (<http://14.139.61.8/PtRNAdb/pages/method.php>). The output of tRNAscan-SE was saved in  
115 six different forms of output files namely (bed, fasta, iso, out, report, ss, stats). Further  
116 intensive filtering and analysis was performed on the output data so that only reliable tRNA  
117 genes can be presented in the database.

#### 118 **tRNA sequence filtration**

119 With the aim the to report only reliable and accurate tRNA sequence predictions, various  
120 filters were applied on the tRNAscan-SE output. The filtration of tRNAs from the nuclear  
121 genomes was done by filtering out the pseudogenes, undetermined tRNAs (i.e. having  
122 unambiguous isoacceptors and isodecoders), removing tRNA sequences with more than 2 %  
123 of unambiguous nucleotide composition (i.e. N/n), removing large intronic sequences from  
124 tRNAs and removing organellar (i.e. mitochondrial and plastidial) imported nuclear tRNAs.  
125 In the organellar tRNAs, the undetermined tRNA sequences (i.e. having unambiguous  
126 isoacceptors and isodecoders) were filtered out and the tRNA sequences with more than 2 %  
127 of unambiguous nucleotide composition (i.e. N/n) were also discarded. After these filtering  
128 steps, the quantity of tRNA sequences were reduced but the quality of the overall dataset  
129 improved significantly which is proved by further analysis.

#### 130 **tRNA consensus sequence based study**

131 Followed by the filtering steps, consensus sequence based study was performed on the tRNA  
132 sequences of each plant. The consensus study was performed on the isoaccpetors and  
133 isodecoders of each plant and the output was a consensus alignment and consensus structure

134 using RNAalifold (3). For this consensus sequence based study, the tRNA sequences from  
135 each amino acid was grouped into a single fasta file and similarly, tRNA sequences from  
136 each anticodon/isodecoder was collected into a single fasta file. Therefore, as a result of this  
137 grouping, now for each plant species there are 20 fasta files according to the isoacceptors and  
138 64 isodecoder wise fasta files. After this, all the fasta files were provided as an input to the  
139 LocARNA (4) software for consensus sequence study via an in-house shell script. LocARNA  
140 uses Clustal W (5) to align the tRNA sequences. The consensus alignment and the consensus  
141 based tRNA structure is available for all the plants present in PtRNAdb and can be accessed  
142 either isoacceptors or isodecoder wise from the detailed page of the database. Moreover, a  
143 consensus based phylogenetic tree was constructed for each isoacceptor and isodecoder of all  
144 plants using Environment for Tree Exploration (ETE) (6). This consensus based phylogenetic  
145 tree is also available for all the plants along with the consensus alignment and structure.  
146 However, the isoacceptor and isodecoder groups which contain only one tRNA sequence, do  
147 not have any consensus based alignment or any consensus based structure since it is only a  
148 single sequence. For those single tRNA sequence entries, RNAfold was used which is a  
149 utility of ViennaRNA package 2.0 (7) to model the tRNA structure.

#### 150 **Building tRNA infernal covariance models**

151 Apart from this, probabilistic models were built for each amino acid and anticodon group  
152 using various infernal (8) utilities. Probabilistic profiles of the sequence and secondary  
153 structure of the isoacceptors and isodecoders was built known as covariance models (CMs).  
154 Infernal ("INFERence of RNA ALignment") (8) is for searching DNA sequence databases for  
155 RNA structure and sequence similarities. It is an implementation of a special case of profile  
156 stochastic context-free grammars called *covariance models* (CMs). A CM is like a sequence  
157 profile, but it scores a combination of sequence consensus and RNA secondary structure  
158 consensus, so in many cases, it is more capable of identifying RNA homologs that conserve  
159 their secondary structure more than their primary sequence. In order to build these infernal  
160 models, firstly, the Stockholm files of each isoacceptor and isodecoder group was provided to  
161 "cmbuild" utility of infernal. The Stockholm files were obtained from the previous step in  
162 which the consensus study was performed using "mlocarna". The "cmbuild" utility builds the  
163 initial covariance model from an input multiple alignment or Stockholm file. After this,  
164 "cmcalibrate" utility is used which calibrates the E-value parameters for the covariance  
165 model. In this last step, we need to integrate our models into the database, therefore,  
166 "cmpress" utility was used to format a CM database into a binary format for "cmscan" that is

167 integrated in the PtRNAdb. Users can provide their query sequence in the “ANALYZE”  
168 module of PtRNAdb database and select the respective plant and isodecoder or isoacceptors  
169 model to run cmscan on the query sequence. The output can be downloaded in the result page  
170 of Infernal module.

### 171 **PtRNAdb web interface development**

172 We have developed PtRNAdb using Apache HTTP server (version 2.4.6) integrated with  
173 PHP (version 7.3.3) and MySQL (version 8.0.15) on server machine with Centos 7 Linux as  
174 operating system. PHP and JavaScript (version 1.8.0) were used to develop the back-end of  
175 the database while MySQL (version 8.0.15) was used to process the data at the back-end. The  
176 graphical representation of an overall architecture of PtRNAdb along with the features are  
177 displayed in Figure 1. CSS and HTML was used to make the template responsive. Perl and  
178 shell scripts were also integrated at the back-end of the database for multiple file handling  
179 and data manipulation.

### 180 **Features incorporated in PtRNAdb**

181 This database is developed with the aim to provide a user-friendly and simple interface. In  
182 order to accomplish this aim, “Search” and “Browse” options are provided on the database.  
183 On the search page of PtRNAdb, user can make complex search queries by selecting multiple  
184 options and refining the number of output to very specific results or else select less options  
185 for broad results. The browse module provides two options to browse through all the entries  
186 present in the database: “Browse by tRNA sequence length range” and “Browse by plant  
187 family”. This module is very useful in case user do not have any pre-handled information  
188 about tRNAs or the database and just wants to understand the features of the database. Apart  
189 from the “search” and “browse” modules, “BLAST” module was also incorporated. In this  
190 module, we have integrated blastn (9) option from the BLAST software package. This  
191 module is very useful to find regions of similarity between the user input FASTA sequences  
192 and PtRNAdb database sequences or PlantRNA database sequences or NCBI reported tRNA  
193 sequences. User can also manipulate the E-value by using the drop down option on the  
194 “BLAST” module which is set at 10 by default.

195 Apart from the modules, the output tables of the search and browse modules are highly  
196 dynamic. In the output search table, the users can further refine the output according to their  
197 requirements by using the search box and also shuffle through large number of output entries

198 easily by using the pagination links. It expected that these additional features will make the  
199 experience of the user more pleasant and easy to understand the database.

200

201

## 202 **Results and Discussion**

203 In total, 109902, tRNA genes were registered from the nuclear genome of 106 photosynthetic  
204 organisms. We also analysed 127 organellar genomes out of which, 89 samples were plastid  
205 genomes and 38 mitochondrial genomes. In the 89 plastid genome samples, we identified  
206 2930 tRNA genes and in 38 mitochondrial genome samples we identified 1017 tRNA genes.  
207 Majority of the nuclear as well as organellar genome samples are from dicots i.e. 74 and 91  
208 dicots of nuclear and organellar genomes followed by 29 monocots from nuclear genome and  
209 30 monocots from organellar. Both algae and bryophyte samples were present in low  
210 numbers but, no pteridophytes was not present in this study.

211 The total number of tRNA entries available in the current version of PtRNAdb is 113849. In  
212 order to show the relation between the genome size of the plants and the number of tRNAs,  
213 pseudogenes and introns, all these data was shown in figure 2 for all the three levels of  
214 genomes (i.e. nuclear, plastid and mitochondrial). In part A of figure 2, the plants with  
215 nuclear genome is shown and it is quite clear that, with the increase in the genome size, the  
216 number of tRNAs, number of pseudogenes and number of introns are increasing. Similarly, in  
217 part B and part C of figure 2, a similar graph is visible except there is not pseudogenes. This  
218 is because in the tRNAscan-SE algorithm, there is no pseudogene prediction for organellar  
219 genome data. Therefore, only genome size (in Kb), number of tRNAs and number of  
220 pseudogenes is shown for plastid and mitochondrial genomes. The initial number of tRNAs  
221 and the number of true tRNAs obtained after filtration steps is available supplementary table  
222 1. As a result of the filtration steps performed, the quality of the tRNA sequences improved  
223 which was found in the consensus sequence study using locARNA. All the results and data  
224 available on the database can be retrieved very easily and for understanding each module of  
225 the database in a comprehensive manner, user should refer to the help page of PtRNAdb  
226 where the usability of all the modules are explained in detail.

227 Majority of the filtered tRNA sequences were from nuclear genome samples since, there were  
228 more tRNA filtration steps that were applied to the nuclear tRNA sequences. This can be



229 evidently seen in the supplementary table 1 in which all the plants along with their initial  
230 tRNA count and post filtration tRNA sequence count are mentioned. In order to check the  
231 tRNA sequences of our database, we also cross validated our tRNA sequences with that of  
232 PlantRNA (10) database. Therefore, the all the tRNA sequences of PlantRNA database was  
233 retrieved and a database was developed using the ‘makeblastdb’ utility of the BLAST (9). All  
234 the true tRNA sequences of PtRNAdb database was provided as query input sequence data  
235 and ‘blastn’ was run using PlantRNA as the database. As a result of this analysis, we found  
236 1346 tRNA sequences from the PlantRNA database that were exactly identical with 53,315  
237 tRNA sequences of PtRNAdb database. Moreover, there were 1640 tRNA sequences from  
238 PlantRNA database with more than 75% identity with 90,022 tRNA sequences of PtRNAdb.  
239 Although, there is a huge amount of difference in the number of tRNA sequences reported in  
240 PlantRNA and PtRNAdb database, since, PlantRNA database reports tRNAs from only 12  
241 plant species and PtRNAdb reports tRNAs from more than 100 plant species, but the evident  
242 number of tRNA matches indicate that, the data of PtRNAdb is reliable.

243 We have built covariance models using various utilities of infernal (11) like ‘cmbuild’,  
244 ‘cmcalibrate’ and ‘cmpress’ so that the users can structurally align their query sequences with  
245 different isotype and isodecoder models from various plants in PtRNAdb. This is available in  
246 the ‘ANALYZE’ module of PtRNAdb which is one of the key features of PtRNAdb. User  
247 will have to select a plant among one of the three genome levels followed by selecting the  
248 isoacceptors or isodecoder. The results of this module is available to download in two  
249 different formats i.e. in tabular format and in detailed output format exactly like shown in the  
250 result page of this module. To structurally align the user query sequence with the covariance  
251 model selected by the user, ‘cmscan’ utility of infernal is used. Since, Infernal’s cmscan or  
252 cmalign are always considered best for proper structural alignments, this module will provide  
253 the user with accurate alignments. Further, the consensus based study shows promising tRNA  
254 sequence consensus alignments and consensus tRNA structures. Although, some of the  
255 consensus structures of tRNA are not of very good quality and lack accuracy, but with future  
256 addition and curation of the existing data the consensus structures will improve and prove to  
257 be more reliable. The consensus study aims take into account whole groups of tRNAs based  
258 on isoacceptors and isodecoders, that is more accurate rather than, individual tRNA  
259 structures. However, the tRNA sequences which had only single isoacceptors or isodecoder  
260 do not have any consensus based alignments or structures. In such cases RNAfold which is a  
261 utility of Vienna RNA package (7) was used to build the tRNA structures and is shown on the



262 detailed output page along with the RNA Dot Plot generated by RNAfold. This plant tRNA  
263 knowledgebase is aimed to provide large scale accurate information about tRNA biology and  
264 hope to aid in the experimental tRNA research.

265

## 266 **Future Directions**

267 The PtRNAdb will be updated continuously with new and more accurate information along  
268 with better annotation of the existing tRNA sequences. We will continue to upgrade the  
269 quality of the web interface and offer new search possibilities. As the number of the tRNA  
270 entries increase in the database, we will provide file transfer protocol (ftp) and Application  
271 Programming Interface (API) options for the user to easily retrieve the data from PtRNAdb.  
272 A longer term aim of this work will be to enrich the biological information content of the  
273 databases, e.g. profiles, the description of tRNA gene expression profiles, the description of  
274 occurring tRFs and 3D structure models / clover leaf models of all the tRNAs.

## 275 **Acknowledgement**

276 The authors are thankful to DBT (Department of Biotechnology)-eLibrary Consortium  
277 (DeLCON), India for providing access to e-resources. Authors are also thankful to  
278 Distributed Information Sub-Centre (Sub-DIC) of Department of Biotechnology (DBT) at  
279 NIPGR. The authors declare no competing financial interests.

## 280 **Author Contributions**

281 D.D. and A.S. performed the data analysis work for the tRNA sequences of PtRNAdb. D.D.  
282 developed the most of the modules and web interface of the database including the Search,  
283 Browse, Blast and Analyze modules and A.S. developed the tRNA prediction module. D.D.,  
284 S.Z. and S.K. wrote the complete manuscript. D.D. made all the figures and performed  
285 complete analysis that was included in the manuscript. S.K. conceived the idea and  
286 coordinated the project. S.K. agrees to serve as the author responsible for contact and ensures  
287 communication.

## 288 **Competing interests**

289 The authors declare no competing interests.

290

291

292

293

## 294 **References**

- 295 1. Lowe,T.M. and Eddy,S.R. (1997) tRNAscan-SE: a program for improved detection of  
296 transfer RNA genes in genomic sequence. *Nucleic Acids Res.*, **25**, 955–64.
- 297 2. Lowe,T.M. and Chan,P.P. (2016) tRNAscan-SE On-line: integrating search and context for  
298 analysis of transfer RNA genes. *Nucleic Acids Res.*, **44**, W54-7.
- 299 3. Bernhart,S.H., Hofacker,I.L., Will,S., Gruber,A.R. and Stadler,P.F. (2008) RNAalifold:  
300 improved consensus structure prediction for RNA alignments. *BMC Bioinformatics*, **9**,  
301 474.
- 302 4. Will,S., Joshi,T., Hofacker,I.L., Stadler,P.F. and Backofen,R. (2012) LocARNA-P:  
303 accurate boundary prediction and improved detection of structural RNAs. *RNA*, **18**, 900–  
304 14.
- 305 5. Thompson,J.D., Higgins,D.G. and Gibson,T.J. (1994) CLUSTAL W: Improving the  
306 sensitivity of progressive multiple sequence alignment through sequence weighting,  
307 position-specific gap penalties and weight matrix choice. *Nucleic Acids Res.*, **22**, 4673–  
308 4680.
- 309 6. Huerta-Cepas,J., Dopazo,J. and Gabaldón,T. (2010) ETE: a python Environment for Tree  
310 Exploration. *BMC Bioinformatics*, **11**, 24.
- 311 7. Lorenz,R., Bernhart,S.H., Höner zu Siederdisen,C., Tafer,H., Flamm,C., Stadler,P.F. and  
312 Hofacker,I.L. (2011) ViennaRNA Package 2.0. *Algorithms Mol. Biol.*, **6**.
- 313 8. Nawrocki,E.P. and Eddy,S.R. (2013) Infernal 1.1: 100-fold faster RNA homology  
314 searches. *Bioinformatics*, **29**, 2933–5.
- 315 9. Altschul,S.F., Gish,W., Miller,W., Myers,E.W. and Lipman,D.J. (1990) Basic local  
316 alignment search tool. *J. Mol. Biol.*, **215**, 403–410.

- 317 10. Cognat, V., Pawlak, G., Duchêne, A.M., Daujat, M., Gigant, A., Salinas, T., Michaud, M.,  
318 Gutmann, B., Giegé, P., Gobert, A., *et al.* (2013) PlantRNA, a database for tRNAs of  
319 photosynthetic eukaryotes. *Nucleic Acids Res.*, **41**.
- 320 11. Nawrocki, E.P. and Eddy, S.R. (2013) Infernal 1.1: 100-fold faster RNA homology  
321 searches. *Bioinformatics*, **29**, 2933–2935.

322

## 323 **Figure Legends**

324 **Figure 1:** Overview of the web interface, basic functions and features of PtRNADB.

325 **Figure 2:** Relation between genome size, number of tRNAs, number of Pseudogenes and  
326 number of introns of nuclear, plastid and mitochondrial genomes. **A)** Shows relation between  
327 genome size in Mb, number of tRNAs, number of pseudogenes and number of introns in  
328 nuclear genome samples. **B)** Shows relation between genome size in Kb, number of tRNAs  
329 and number of introns in plastid genome samples. **C)** Shows relation between genome size in  
330 Kb, number of tRNAs and number of introns in mitochondrial samples.

## 331 **Table Legends**

332 **Supplementary table 1:** Number of initial and post filtration tRNA sequences in Nuclear,  
333 plastid and mitochondrial genome levels.

# Data Retrieved from NCBI

bioRxiv preprint doi: <https://doi.org/10.1101/2022.03.03.482782>; this version posted March 4, 2022. The copyright holder for this preprint (which was not certified by peer review) is the author/funder, who has granted bioRxiv a license to display the preprint in perpetuity. It is made available under aCC-BY-NC-ND 4.0 International license.

## Major retrievable fields

tRNAscan v2.0.3

Filtering steps

Organellar imported nuclear tRNAs

Unambiguous tRNA sequences

Undetermined tRNA isotype/isodecoder

Removal of pseudogenes

## Modules of PtRNAdb

Search module

Browse module

BLAST module

Analyze module

Run tRNAscan

**PtRNAdb** Database (113849 tRNA sequences)

Nuclear (109902)

Plastidial tRNAs (2930)

Mitochondrial tRNAs (1017)

Consensus study of isotype and isodecoder

PtRNAdb ID

Genome level

Plant Name

Sample number

Chr./mt./pt./chl. information

tRNA name

tRNA locus

Isotype

Isodecoder

Intron start position

Intron end position

Infernal score

HMM score

2' structure score

Classification

tRNA sequence

tRNA sequence length

Secondary structure

Strand information

Phylogenetic tree based on consensus alignment

RNAalifold consensus structure

RNAalifold consensus alignment

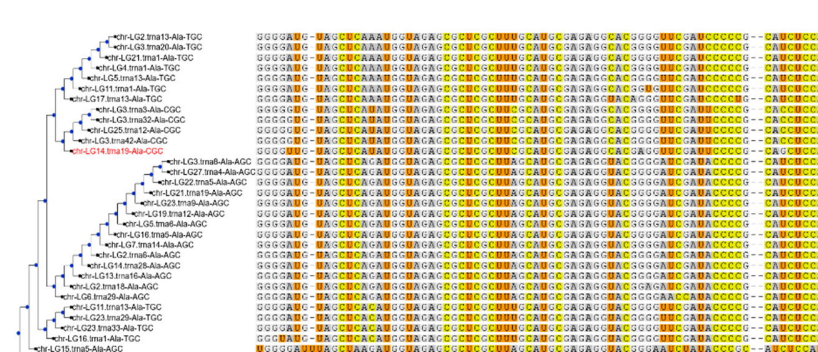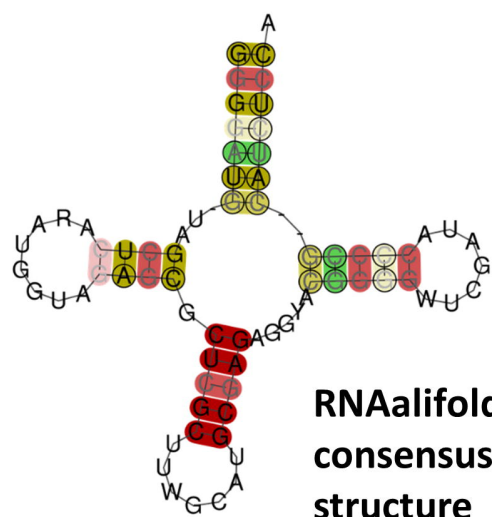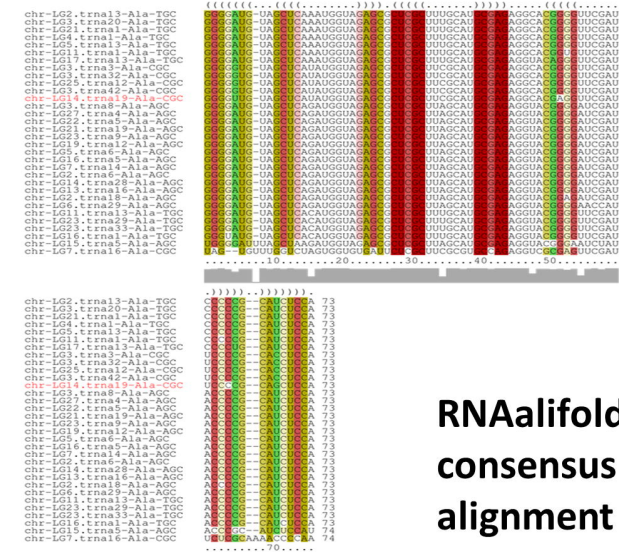



**A**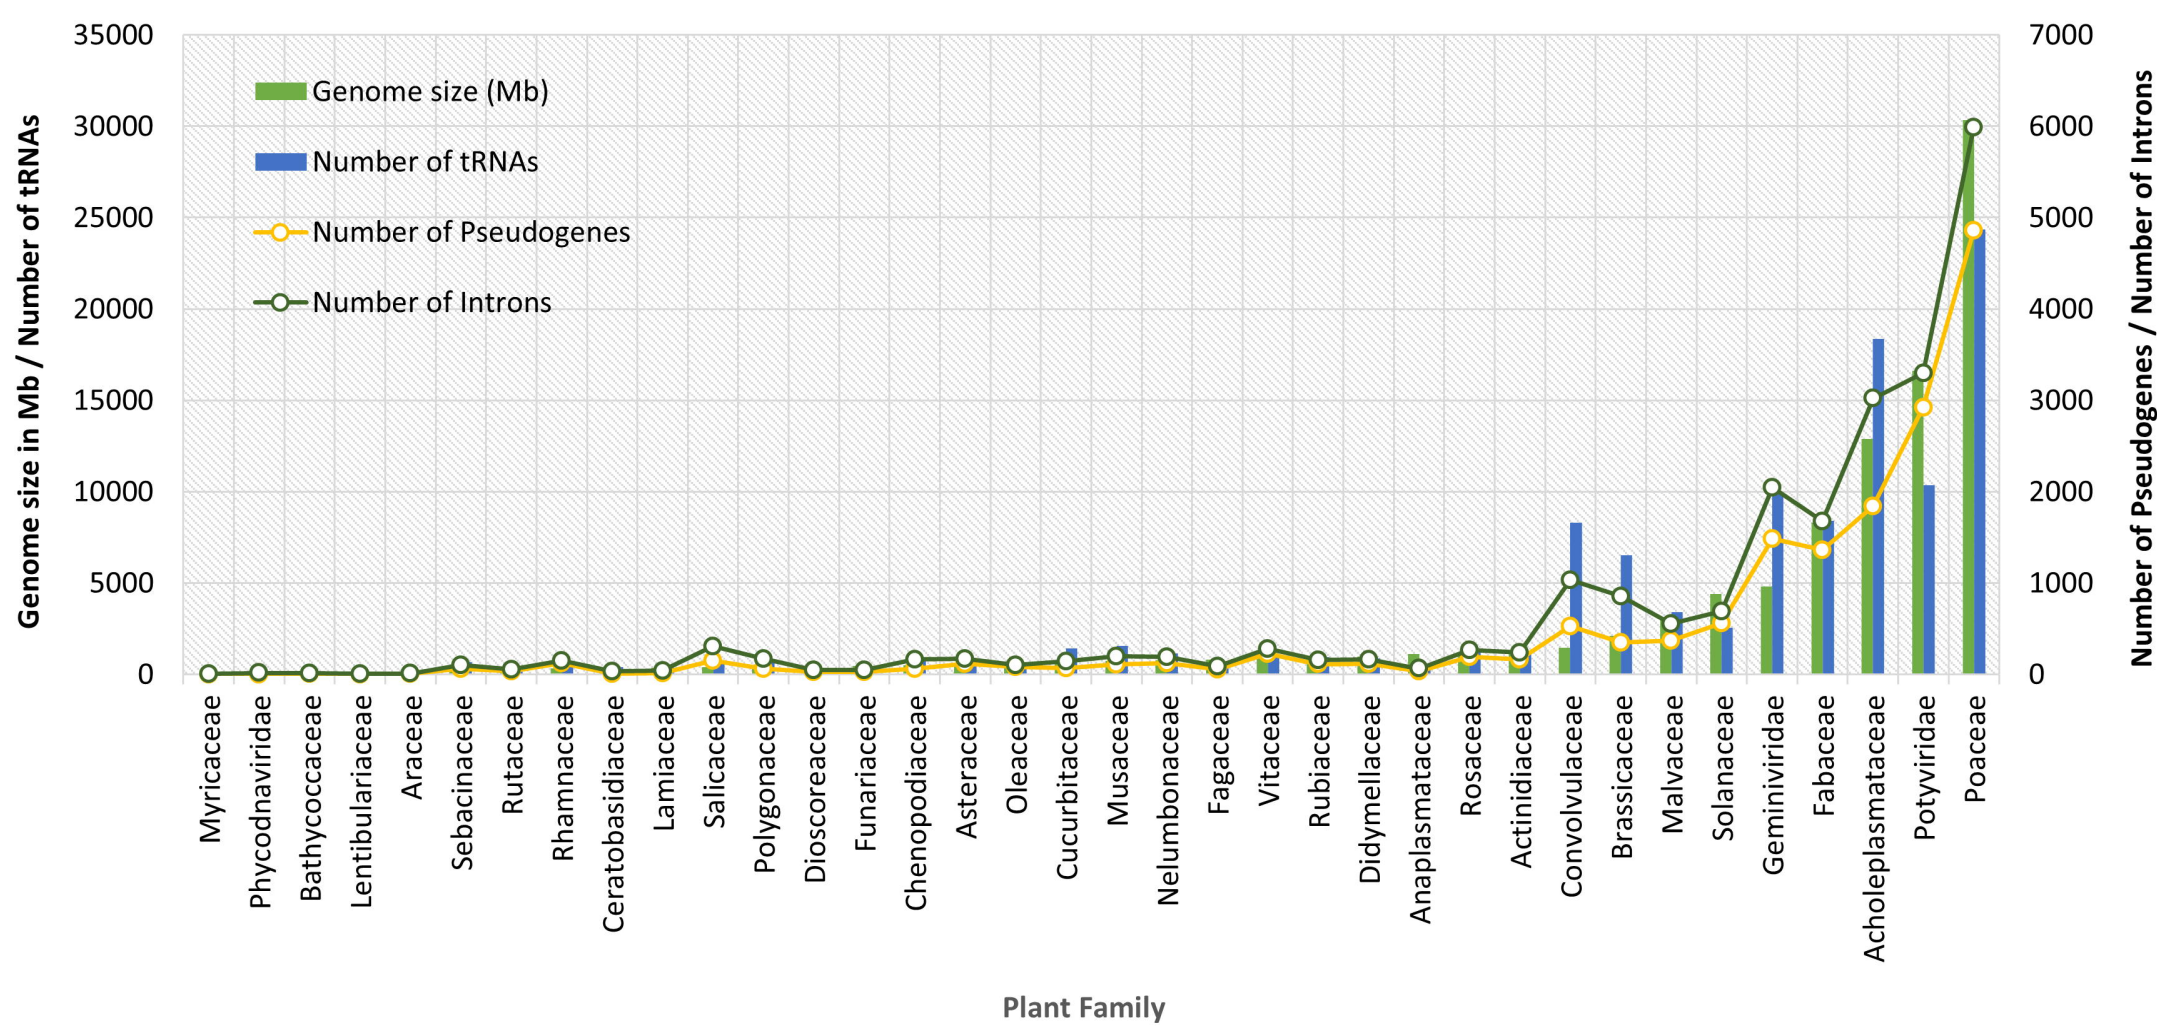**B**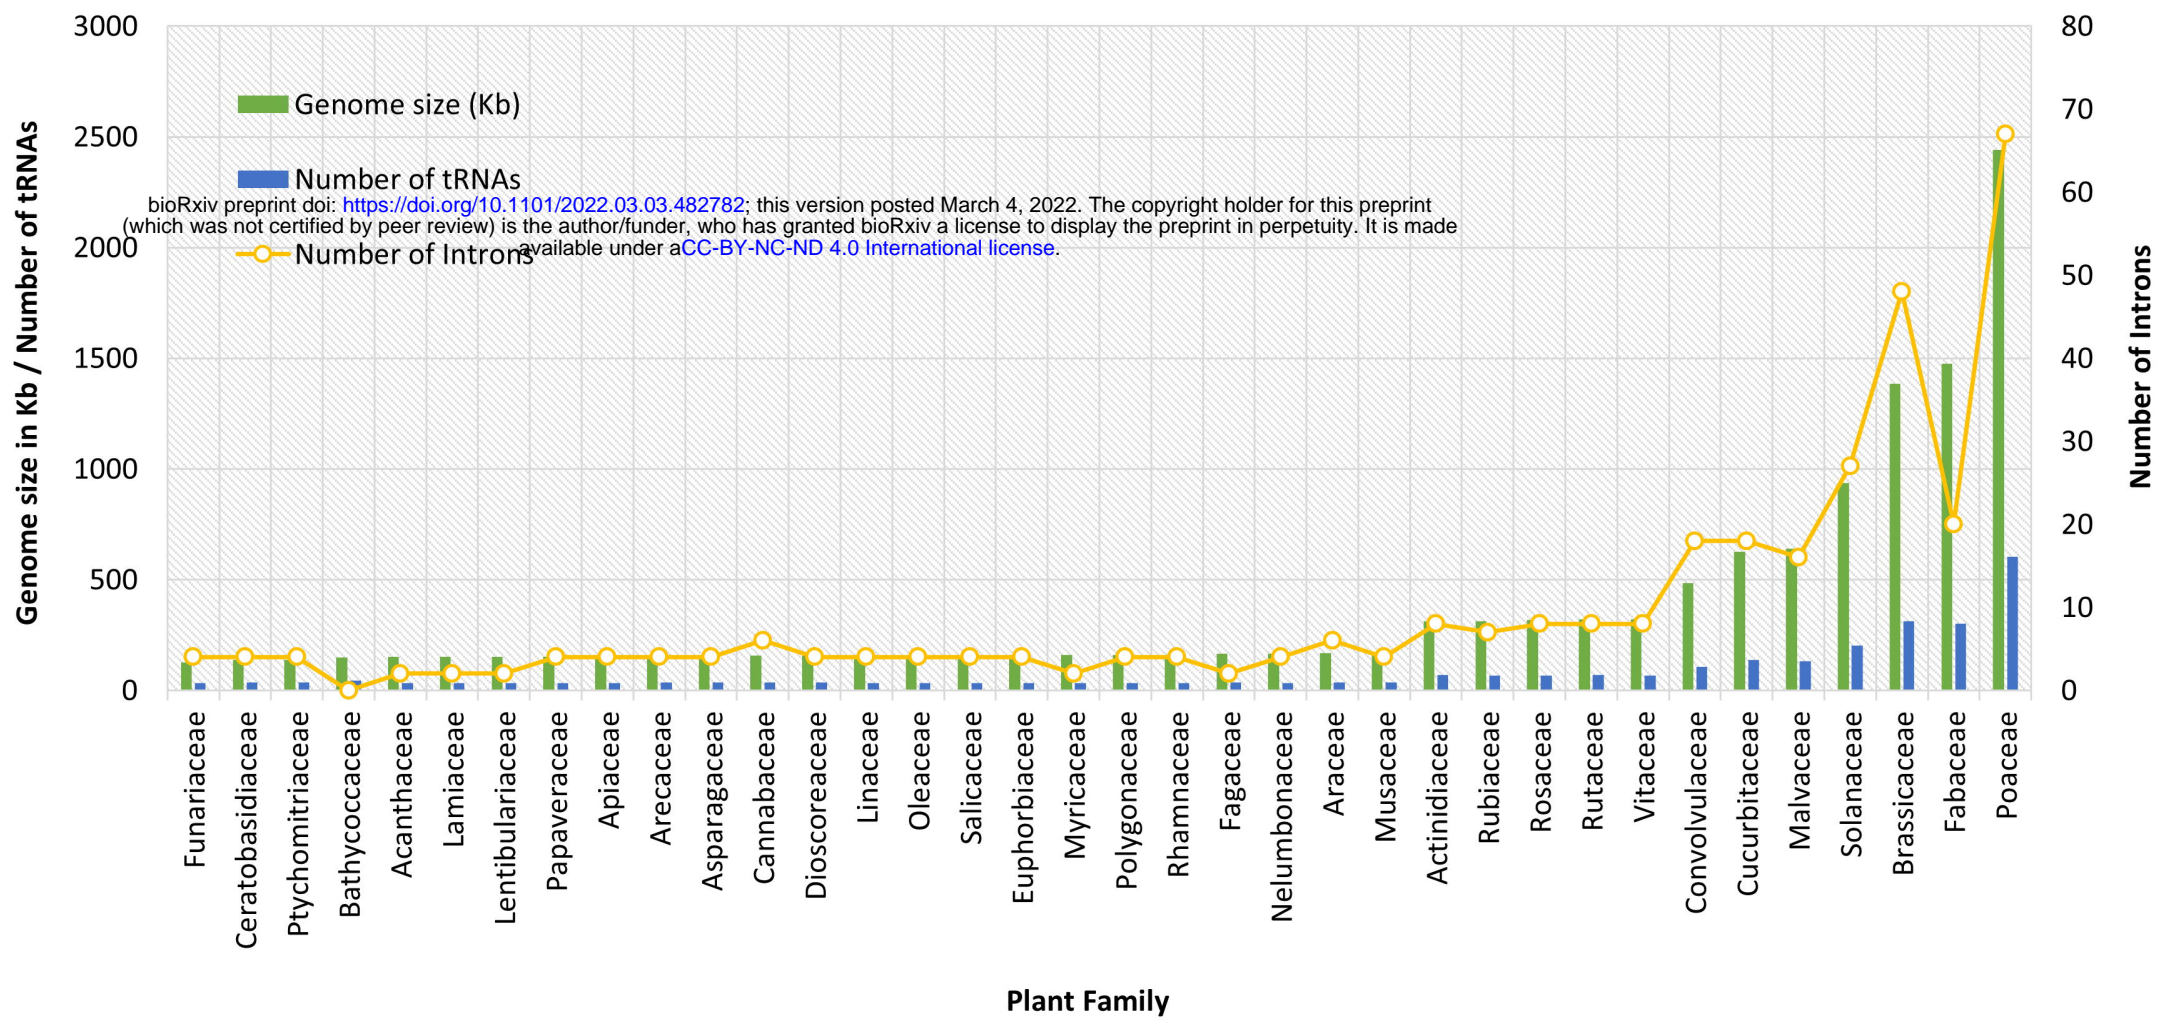**C**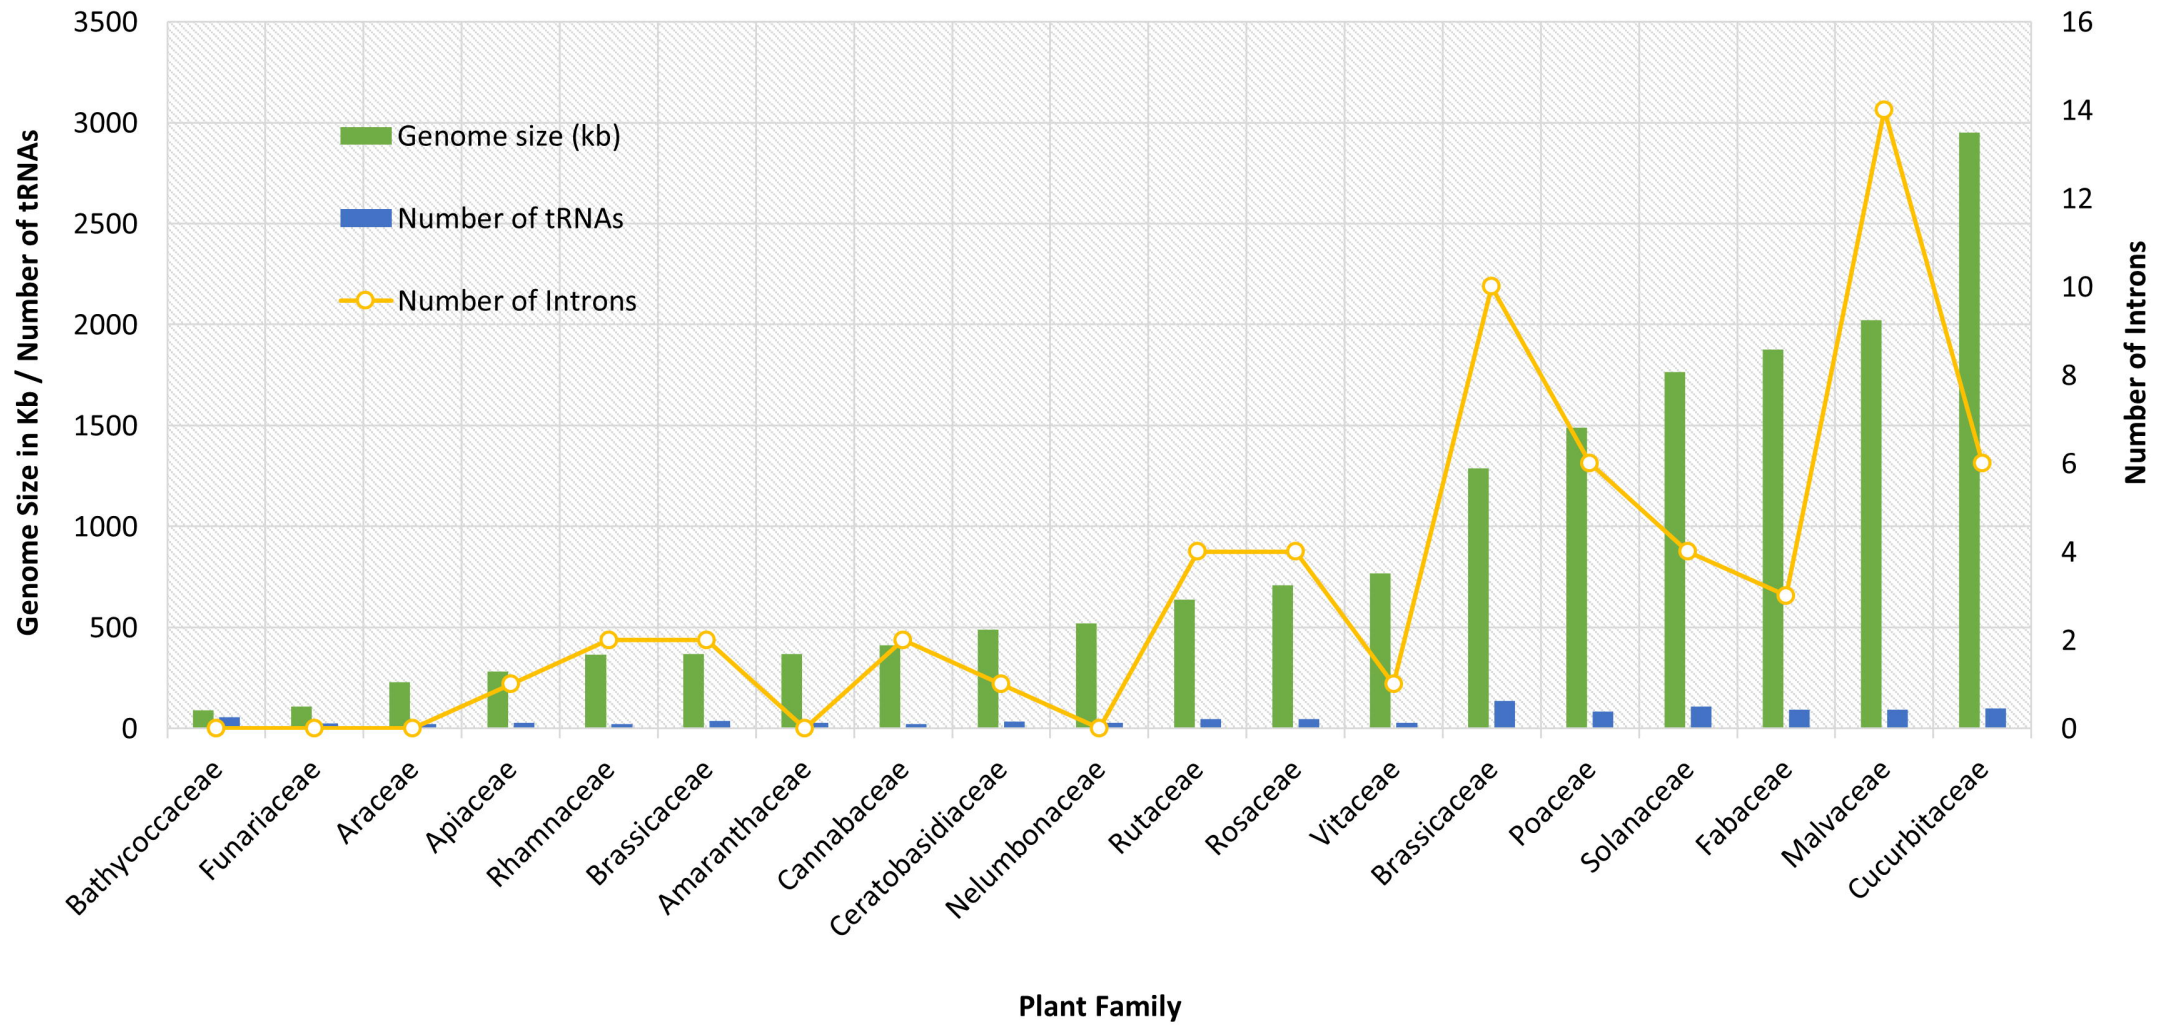

Source: https://www.biorxiv.org/content/biorxiv/early/2022/03/04/2022.03.03.482782.full.pdf
